# Supplementary material for: CRISPR-Based Multi-Gene Integration Strategies to Create Saccharomyces cerevisiae Strains for Consolidated Bioprocessing
Source: MDPI journal article supplement (doi:10.3390/app122312317), 2022-12-01
Supplement: s1 [file s1]

Supplementary material to:

# **CRISPR-based multi-gene integration strategies to create *Saccharomyces cerevisiae* strains for consolidated bioprocessing**

Odwa Jacob <sup>1</sup>, Gert Rutger van Lill <sup>1</sup> and Riaan den Haan <sup>1,\*</sup>

Department of Biotechnology, University of the Western Cape, Bellville, 7530, South Africa

\*rdenhaan@uwc.ac.za

**Table S1: Primers used in the study.**

| Primer Name   | Primer sequence (in 5'-3' direction)    | TA used | Application                                                                                                                     |
|---------------|-----------------------------------------|---------|---------------------------------------------------------------------------------------------------------------------------------|
| CHX_ENO-L     | GCAGTTATCTCTGTGTCCAGATCCCTTTGA          | 57°C    | Amplification of the genes flanked by <i>ENO1</i> promoter and terminator to provide ChX homology 3' and 5' ends                |
|               | AGTAAAGTTTATTCAATTTTCTTCTAGGCG          |         |                                                                                                                                 |
|               | GGTTATCTACTG                            |         |                                                                                                                                 |
| CHX_ENO-R     | CTACAGTAATTGTGCGGTGCAGGGAGGC            | 55°C    | Amplification of the genes flanked by <i>ENO1</i> promoter and terminator to provide CHXI homology 3' and 5' ends               |
|               | AATGTTTAGTGATCTCCTCCGTCGAACA            |         |                                                                                                                                 |
|               | ACGTTCTATTAGG                           |         |                                                                                                                                 |
| ChrXI_ENO-L   | TGTAAACAGGTATTGGCTGCTTCATAGTA           | 53°C    | Amplification of the genes flanked by <i>ENO1</i> promoter and terminator to provide CHXII homology 3' and 5' ends              |
|               | CACCCAATTGCTTCTAGGCGGGTATCTACTG         |         |                                                                                                                                 |
|               | GCAACTCTGAAATGTCAAAACGGTCGTGTATA        |         |                                                                                                                                 |
| ChrXI_ENO-R   | AATAAATGCCGTGCAACAACGTTCTATTAGG         | 53°C    | Amplification of the genes flanked by <i>ENO1</i> promoter and terminator to provide CHXII homology 3' and 5' ends              |
|               | GCGTCTACAGCGTGATGAAAATTCGCCTGC          |         |                                                                                                                                 |
|               | TGCAAGATCTTCTAGGCGGGTATCTACTG           |         |                                                                                                                                 |
| ChrXII_ENO-L  | CTGTCAAACCTCTGAGTTGCCGTGATGTGACA        | 53°C    | Amplification of the genes flanked by <i>ENO1</i> promoter and terminator to provide CHXII homology 3' and 5' ends              |
|               | CTGTGACCCGTGCAACAACGTTCTATTAGG          |         |                                                                                                                                 |
|               |                                         |         |                                                                                                                                 |
| DELTA-ENO1-L  | CTTAAGATGCTCTTCTTATTCTATTAATAATAGA      | 53°C    | Amplification of the genes flanked by <i>ENO1</i> promoter and terminator with DELTA homology 3' and 5' ends                    |
|               | AAATGACTTCTAGGCGGGTATCTACTG             |         |                                                                                                                                 |
|               | GTTTGTGCGAAACCCTATGCTCTGTTGTCGG         |         |                                                                                                                                 |
| DELTA-ENO1-R  | ATTGACGTCGAACAACGTTCTATTAGG             | 53°C    | Amplification of <i>A.a.bgl1</i> flanked by <i>SED1</i> promoter and <i>DIT1</i> terminator with CHXI homology 3' and 5' ends   |
|               | TGTAAACAGGTATTGGCTGCTTCATAGTACACC       |         |                                                                                                                                 |
|               | CAATTGATTGGATATAGAAAATTAACGTAAGGCAGTATC |         |                                                                                                                                 |
| Ch11_SEDp-L   | GCAACTCTGAAATGTCAAAACGGTCGTGTATAATAAAT  | 57°C    | Confirmation of the <i>eg2</i> cassette in transformants                                                                        |
|               | GTTACTCCGCAACGCTTTTCTG                  |         |                                                                                                                                 |
|               |                                         |         |                                                                                                                                 |
| CH11_DITt-R   | GTAACATCTCTCTGTAATCCCTTATTCCTTCTAGC     | 59°C    | To confirm presence of <i>eg2</i> , use with ENO1-L                                                                             |
|               | GCAACCCTATATAGAATCATAAAAACATTCGTGA      |         |                                                                                                                                 |
|               | ATCTGGATTAGTAACCTGAGACAAAGCAG           |         |                                                                                                                                 |
| ENO1-L        |                                         | 59°C    | To confirm presence of <i>cbh1</i> , use with ENO1-L                                                                            |
| ENO1-R        |                                         |         |                                                                                                                                 |
| EGR-Rev       |                                         |         |                                                                                                                                 |
| CBH1R-Rev     | TGTTGAGAGAAGTCGTCGGTGTAC                | 60°C    | To check transformants containing genes under SED1p and DIT1t                                                                   |
|               |                                         |         |                                                                                                                                 |
|               |                                         |         |                                                                                                                                 |
| SED1p_check-L | GACAAGCAAAATAAAATACGTTTCGCTC            | 57°C    | To confirm if genes were integrated into the correct CRISPR targeted site, use with ENO1-R                                      |
|               |                                         |         |                                                                                                                                 |
|               |                                         |         |                                                                                                                                 |
| DIT1t_check-R |                                         | 55°C    | qPCR primers for amplification of $\alpha$ -1,2-mannosyltransferase gene (ALG9) in the yeast genome as internal reference gene. |
|               |                                         |         |                                                                                                                                 |
|               |                                         |         |                                                                                                                                 |
| Ch.10Check-L  | GCAGTTATCTCTGTGTCCAGATCC                | 53°C    | qPCR primers for amplification of <i>T.r.eg2</i>                                                                                |
| Ch.11Check-L  | GCCTTCGATTTGACACATCTCTAAGC              |         |                                                                                                                                 |
| Ch.12Check-L  | GCCATTGAGTCAAGTTAGGTCATCC               |         |                                                                                                                                 |
| DeltaCheck-L  | CTGTTGGAATAAAAAATCCACTATCGTC            | 60°C    | qPCR primers for amplification of <i>T.e.cbh1</i>                                                                               |
|               |                                         |         |                                                                                                                                 |
|               |                                         |         |                                                                                                                                 |
| ALG9L         | TGCATTGCTGTGATTGTCA                     | 60°C    |                                                                                                                                 |
|               |                                         |         |                                                                                                                                 |
|               |                                         |         |                                                                                                                                 |
| ALG9R         | GCCAGATTCTCACTTGCAT                     | 60°C    |                                                                                                                                 |
|               |                                         |         |                                                                                                                                 |
|               |                                         |         |                                                                                                                                 |
| Eg2_L         | TCTGCTGCTGCTTTGTCTCAAG                  | 60°C    |                                                                                                                                 |
| Eg2_R         | CTCAACCAAGTAGCCAATGGAG                  |         |                                                                                                                                 |
|               |                                         |         |                                                                                                                                 |
| CBH_L         | TCTAACAACGCTAACACTGGCA                  | 60°C    |                                                                                                                                 |
|               |                                         |         |                                                                                                                                 |
|               |                                         |         |                                                                                                                                 |
| CBH_R         | TAAGTACCACCACAGTCATCGC                  | 60°C    |                                                                                                                                 |
|               |                                         |         |                                                                                                                                 |
|               |                                         |         |                                                                                                                                 |

Table S2: Gene integration target sites on different chromosomes

| Chromosome sites | gRNA targeting sequence (5'-3') |
|------------------|---------------------------------|
| Chr. X           | GTAGCTACAAGAACATATGG            |
| Chr. XI          | GCACCTCTAAACTGCTCCG             |
| Chr. XII         | GTCCTGACAGCCACCGCAG             |
| Delta            | GGAATATTGGGTCAGATGAA            |

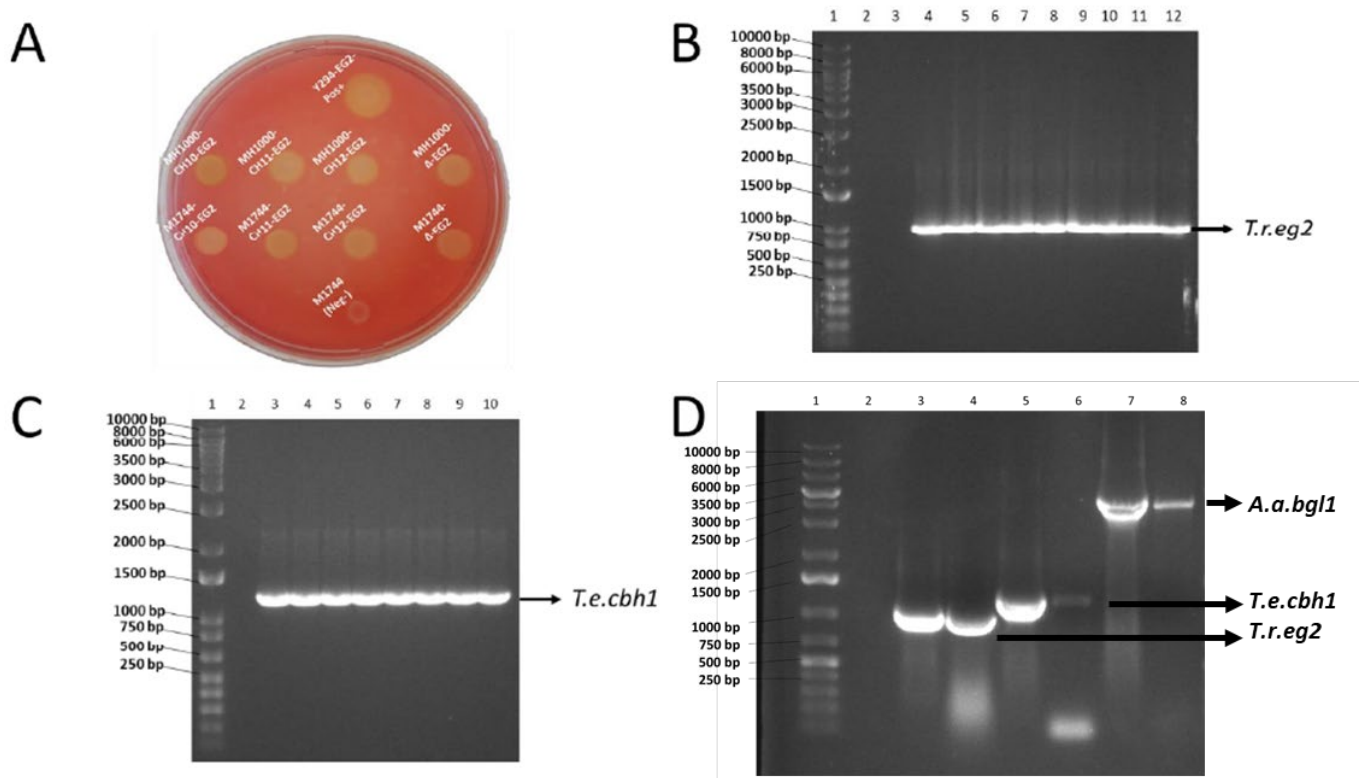

**Figure S1: Confirmation of the cellulase genes integrated into haploid and diploid *S. cerevisiae* isolates.** (a) Screening of *T.reg2* activity in EG2 yeast transformants on a 1% CMC agar plate. The plate was stained with 0.1% Congo Red, and the generated halos represented the EG2 active transformants. Y294 +pRDH147::fur1 and M1744 were used as positive and negative controls, respectively. This plate represents an example as several transformants for each integration locus was screened (b) Electrophoresis of *T.reg2* PCR products from CMC selected yeast transformants on a 1% agarose gel. Lane 1: 1kb Plus DNA Ladder (Invitrogen); Lane 2 and 3: M1744 and MH1000 (negative controls), respectively; Lane 4: Positive control (pRDH180); Lane 5 to 12: *T.reg2* yeast transformants. (c) Electrophoresis of *T.e.cbh1* PCR products from selected yeast transformants on a 1% agarose gel. Lane 1: 1kb Plus DNA Ladder (Invitrogen); Lane 2: M1744 (negative control); Lane 3: Positive control (pMI529); Lane 4 to 10: *T.e.cbh1* yeast transformants. (d) Electrophoresis of three distinct PCR products from the CBP MH1000 strains on a 1% agarose gel. Lane 1: 1kb Plus DNA Ladder (Invitrogen); Lane 2: MH1000 (negative control); Lane 3: pRDH180 (*T.reg2* positive control), Lane 4: *T.reg2* in CBP MH1000; Lane5: pMI529 (*T.e.cbh1* positive control); Lane 6: *T.e.cbh1* in CBP MH1000; Lane 7: pMUSD1 (*A.a. bgl1* positive control); Lane 8; *A.a. bgl1* in CBP MH1000
